# Supplementary material for: Biochemical Characterization of New Gemifloxacin Schiff Base (GMFX-o-phdn) Metal Complexes and Evaluation of Their Antimicrobial Activity against Some Phyto- or Human Pathogens
Source: MDPI journal article supplement (doi:10.3390/ijms23042110), 2022-02-14
Supplement: s1 [file s1]

## Supplementary Materials

# Biochemical Characterization of New Gemifloxacin Schiff Base (GMFX-o-phdn) Metal Complexes and Evaluation of Their Antimicrobial Activity against Some Phyto- or Human Pathogens

Hazem S. Elshafie<sup>1</sup>, Sadeek A. Sadeek<sup>2</sup>, Ippolito Camele<sup>1</sup>, and Amira A. Mohamed<sup>3</sup>

<sup>1</sup> School of Agricultural, Forestry, Food and Environmental Sciences, University of Basilicata, 85100 Potenza, Italy; hs.elshafie@gmail.com

<sup>2</sup> Department of Chemistry, Faculty of Science, Zagazig University, Zagazig 44519, Egypt; s\_sadeek@zu.edu.eg

<sup>3</sup> Department of Basic Science, Zagazig Higher Institute of Engineering and Technology, Zagazig 44519, Egypt; amira222283@yahoo.com

\* Correspondence: ippolito.camele@unibas.it; Tel.: +39-0971-205544; Fax: +39-0971-205503

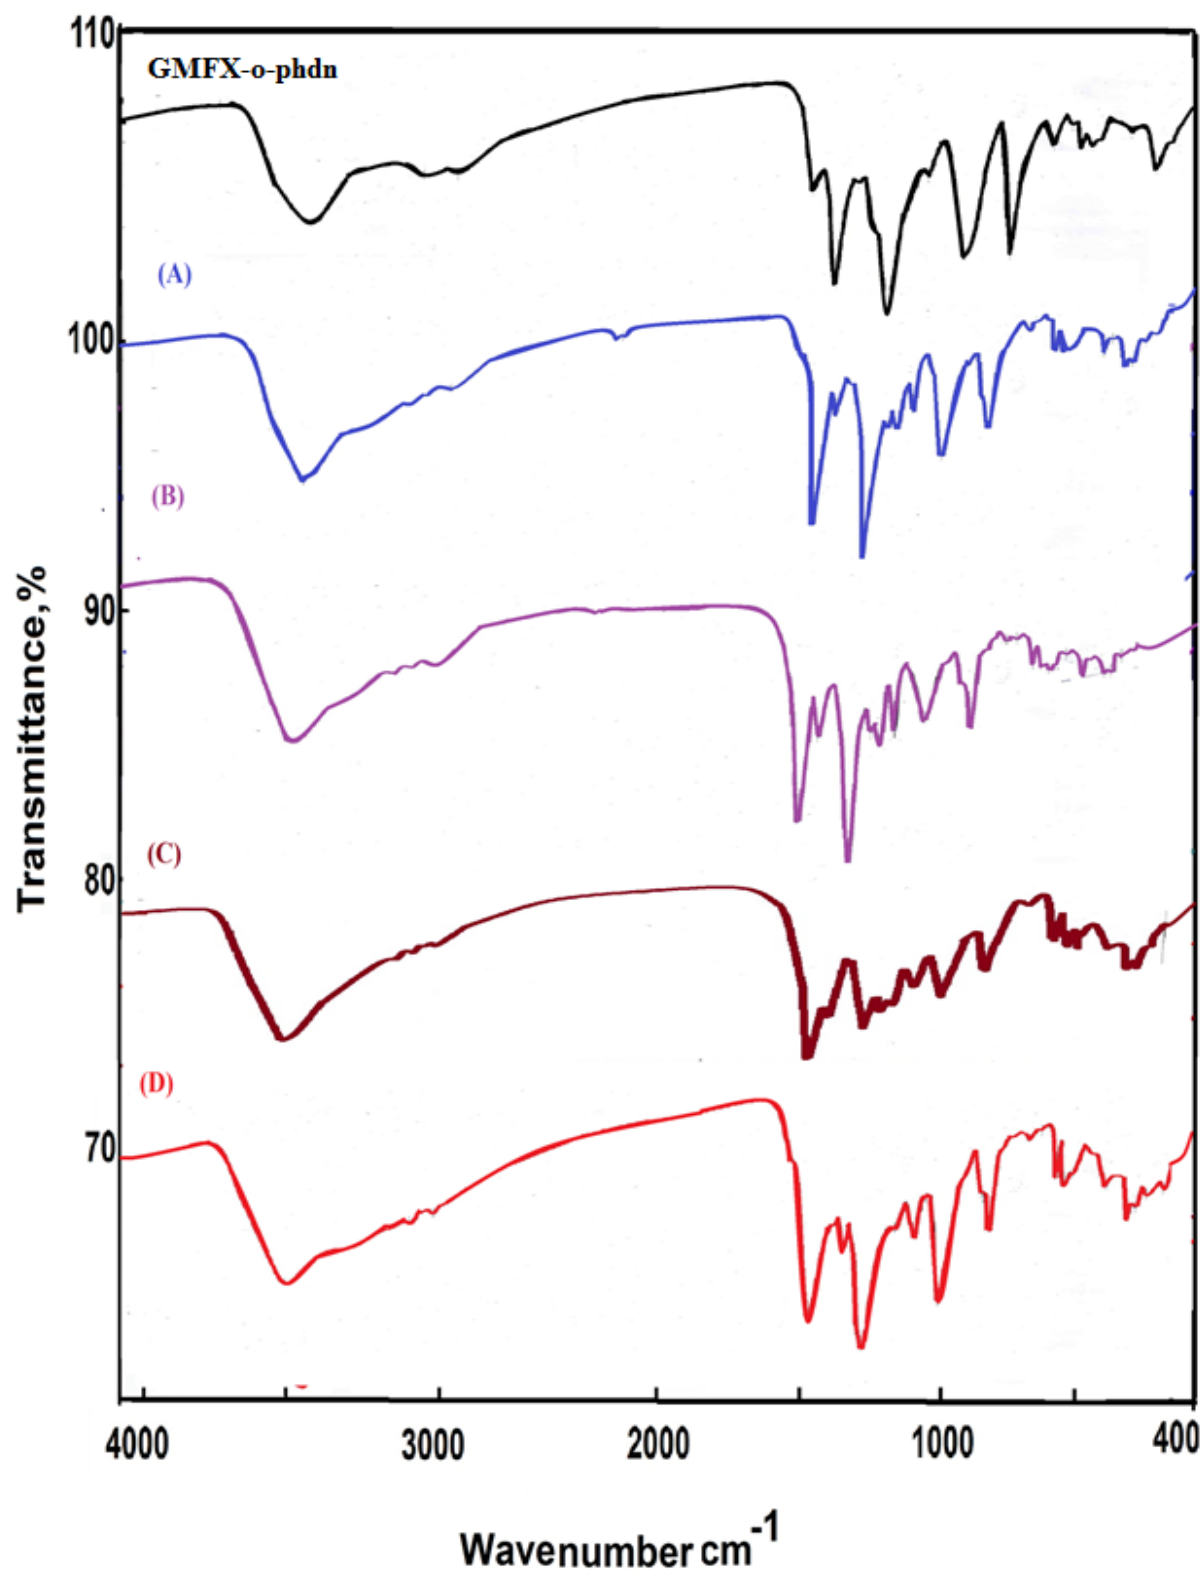

**Figure S1.** Infrared spectra for GMFX-o-phdn and its metal complexes

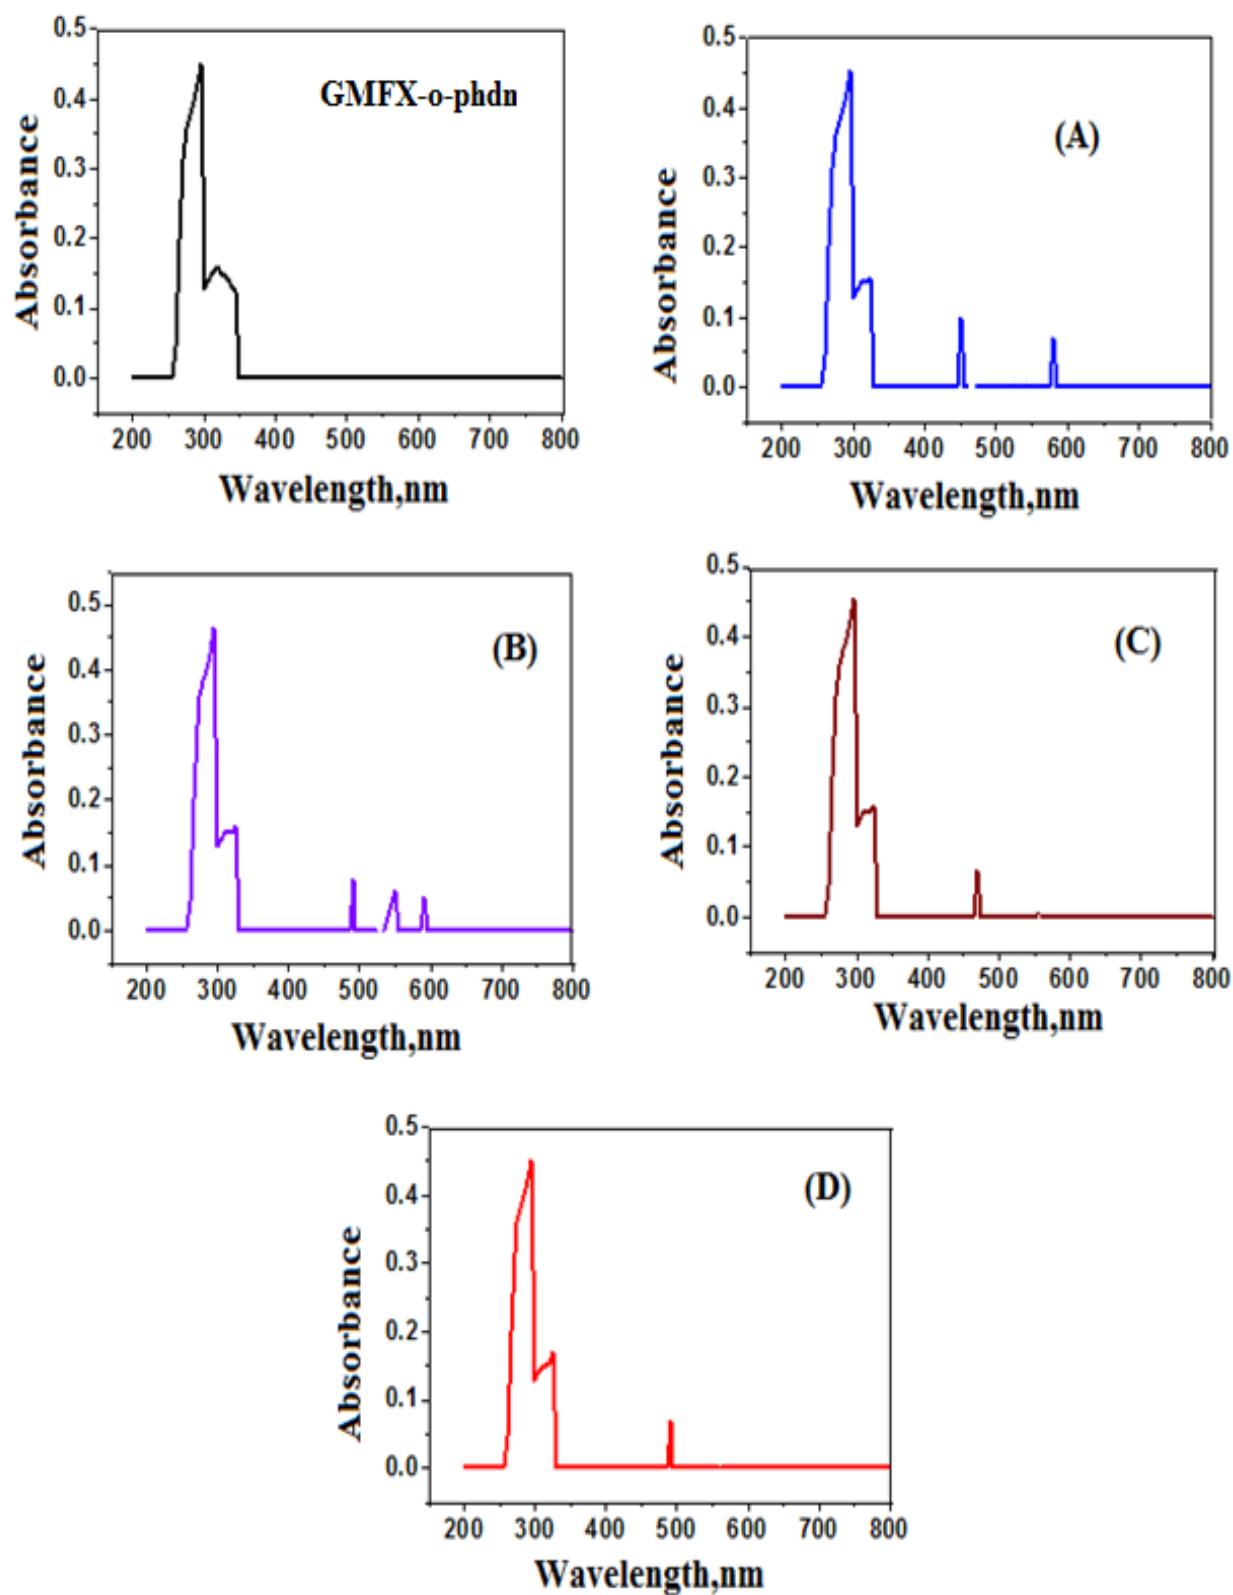

**Figure S2.** Electronic absorption spectra for GMFX-o-phdn and its metal complexes

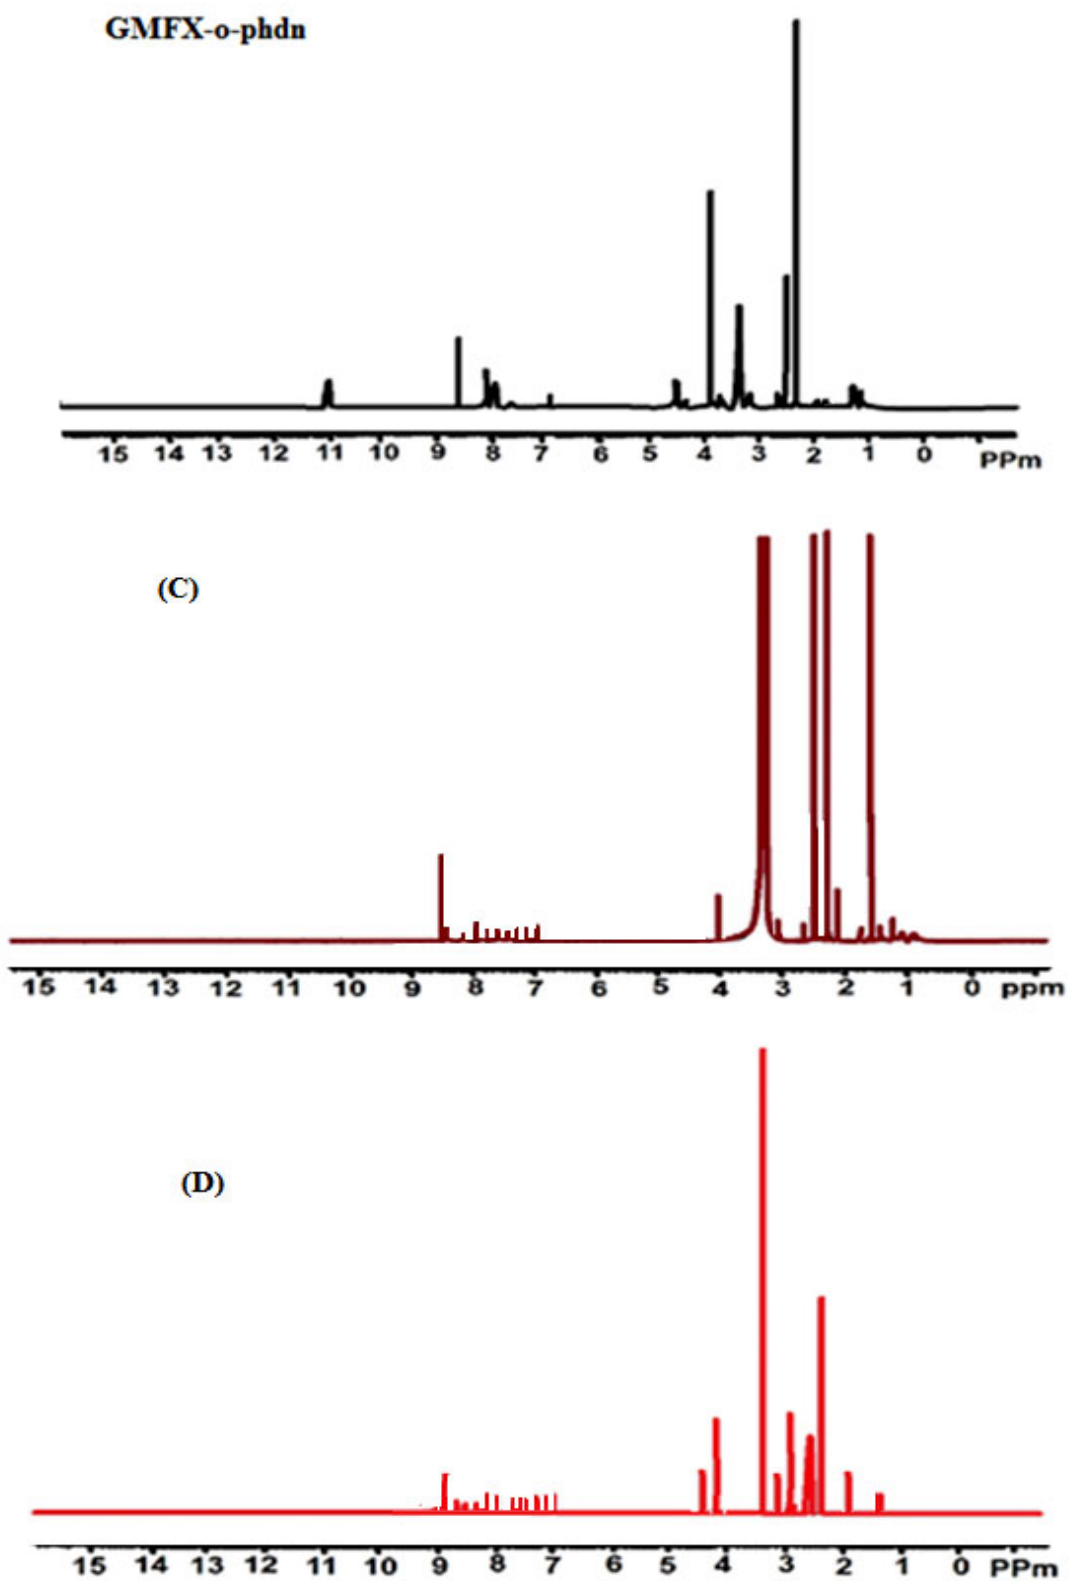

**Figure S3.** <sup>1</sup>H NMR spectra for GMFX-o-phdn, (C) and (D) complexes

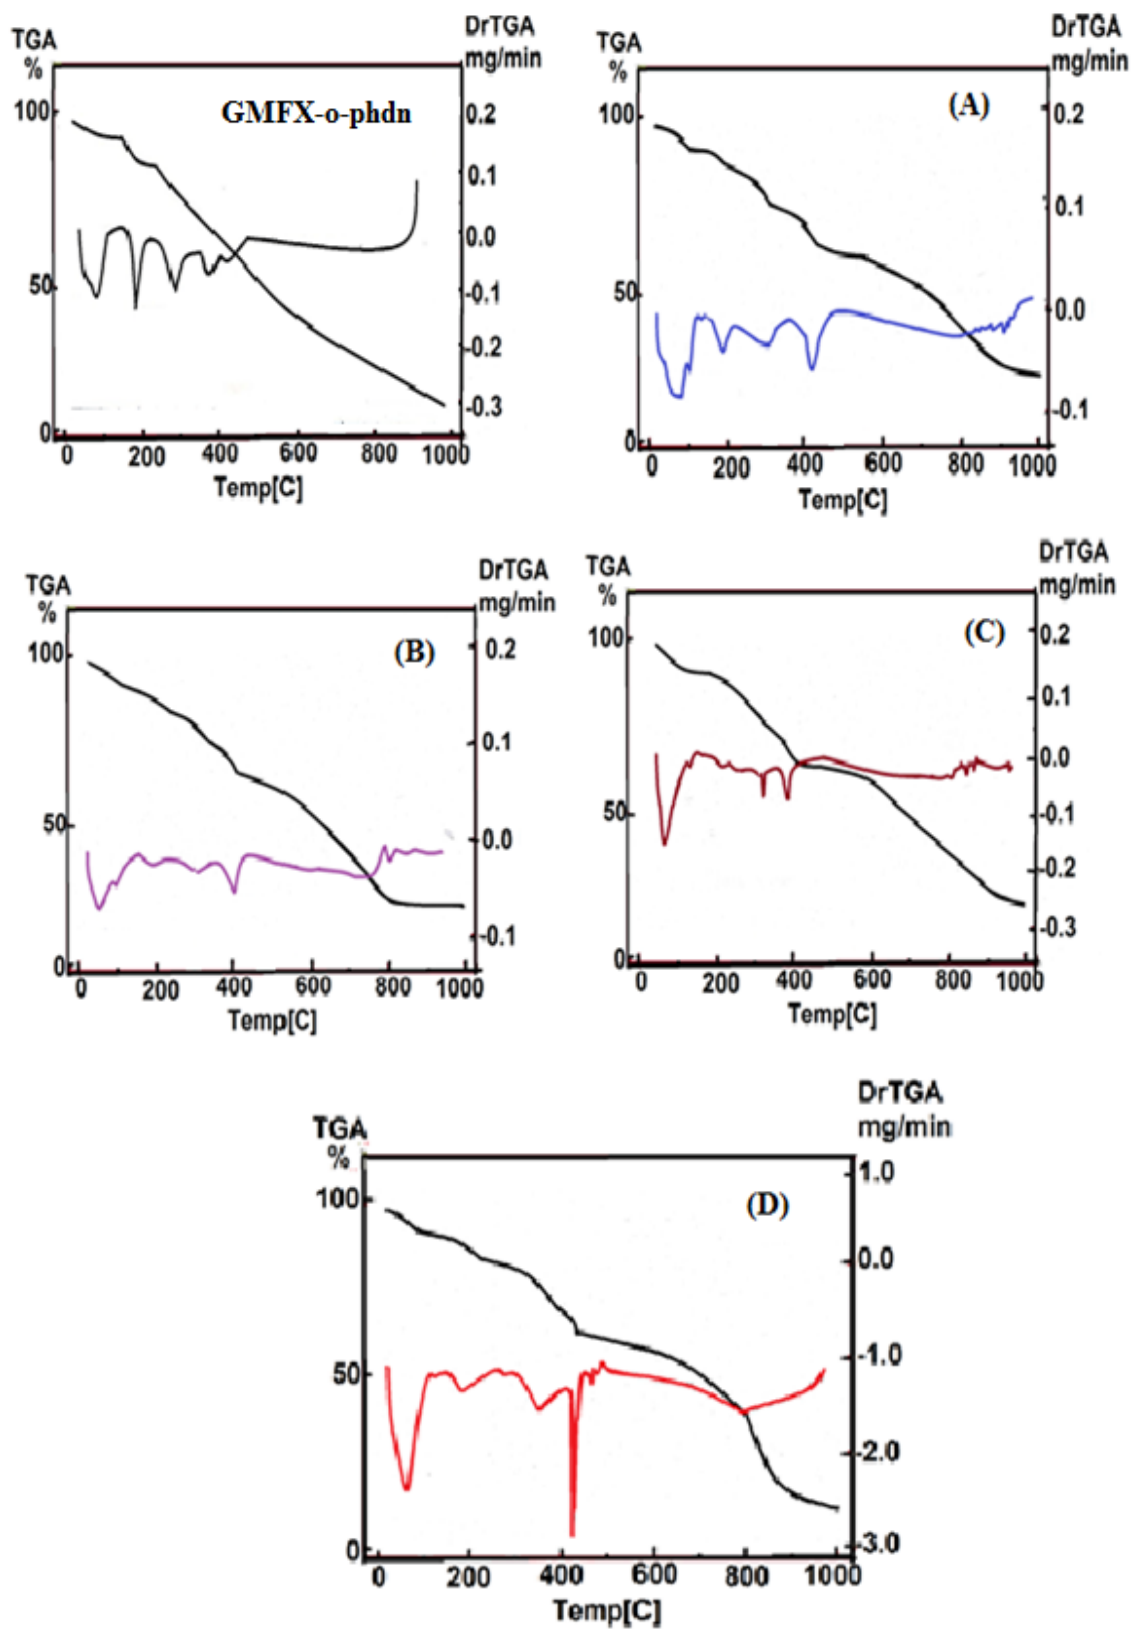

**Figure S4.** TGA and DTG diagram for GMFX-o-phdn and its metal complexes

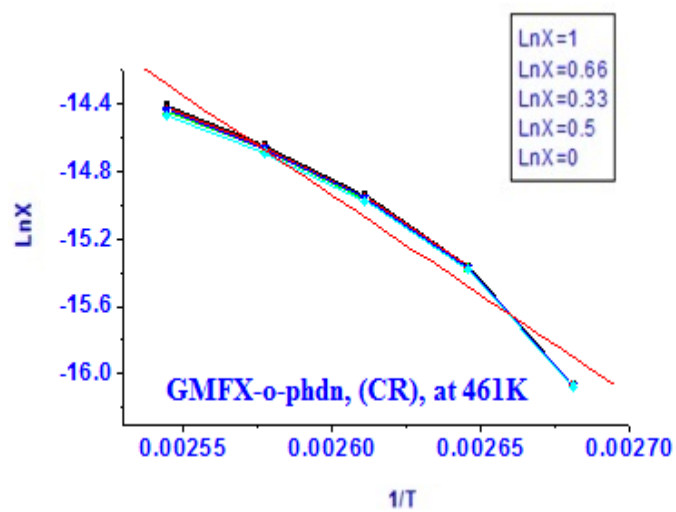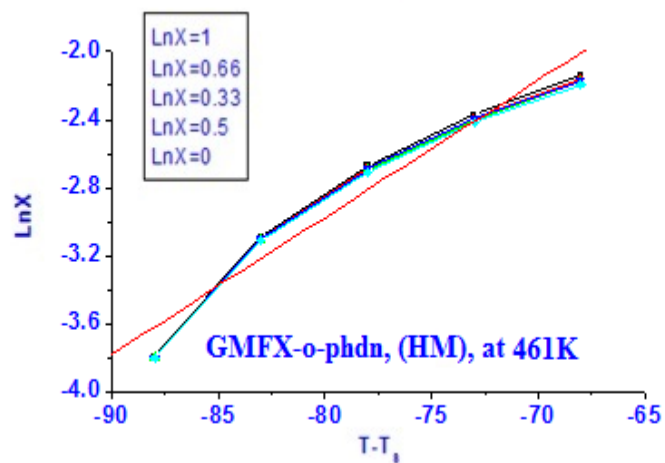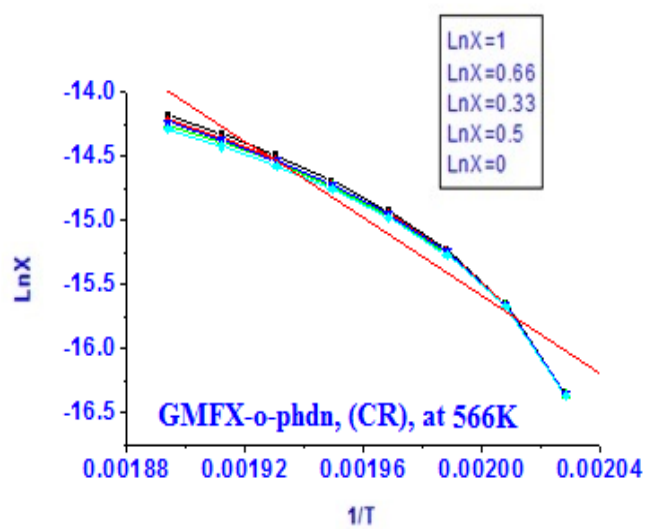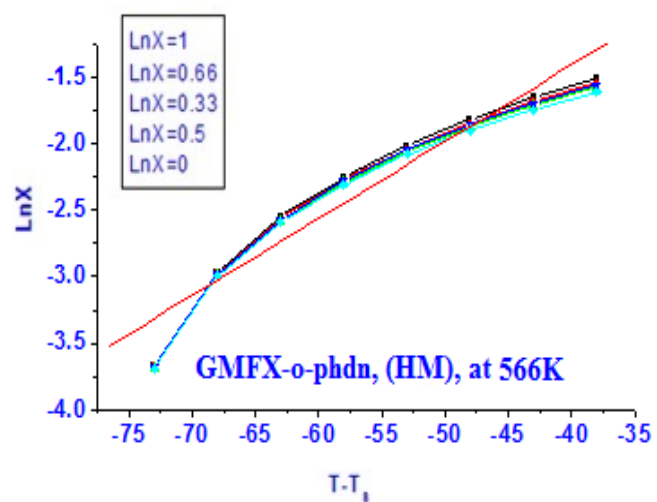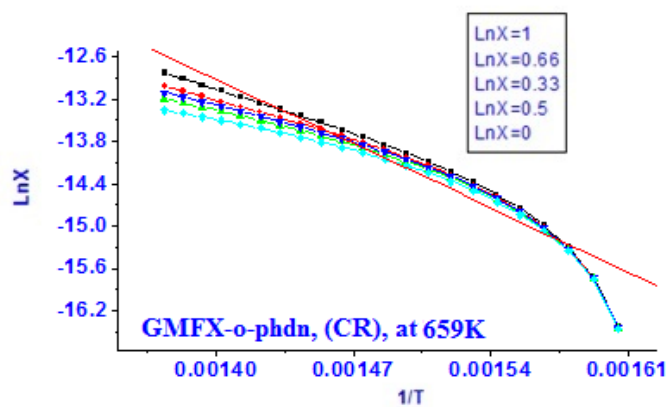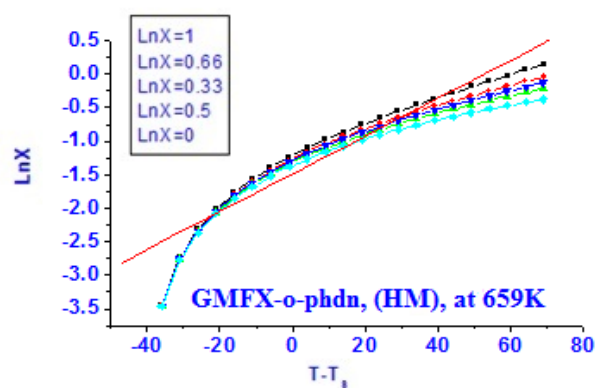

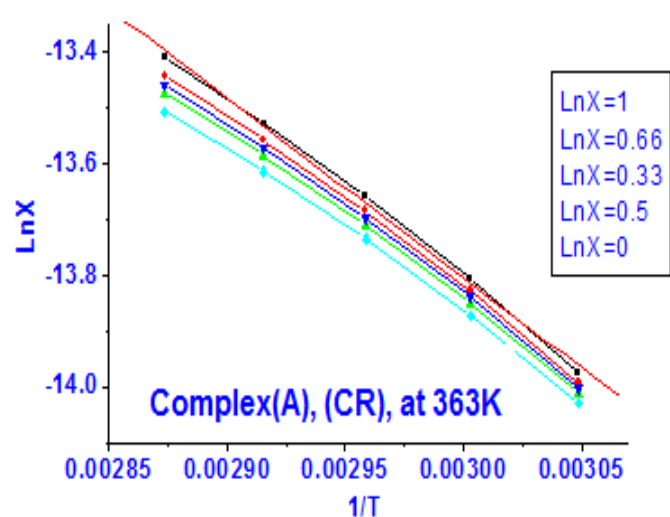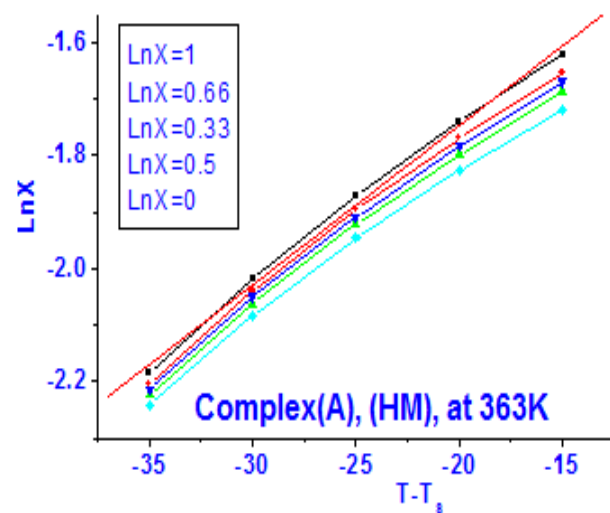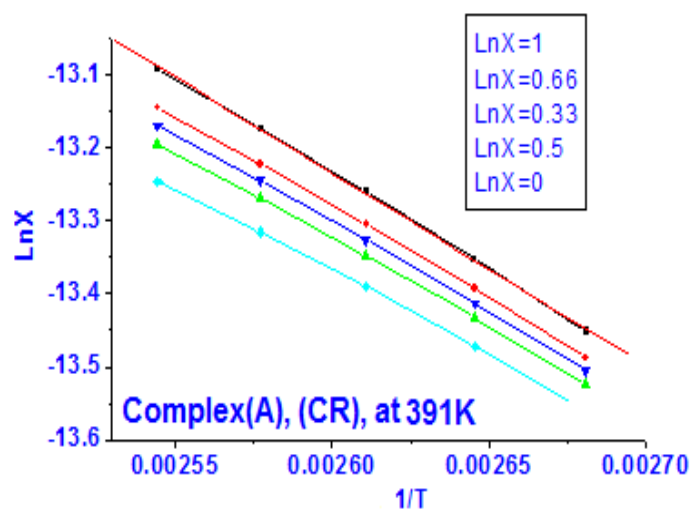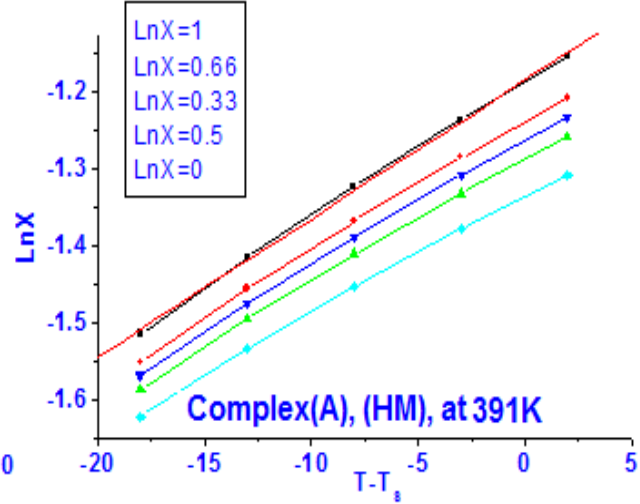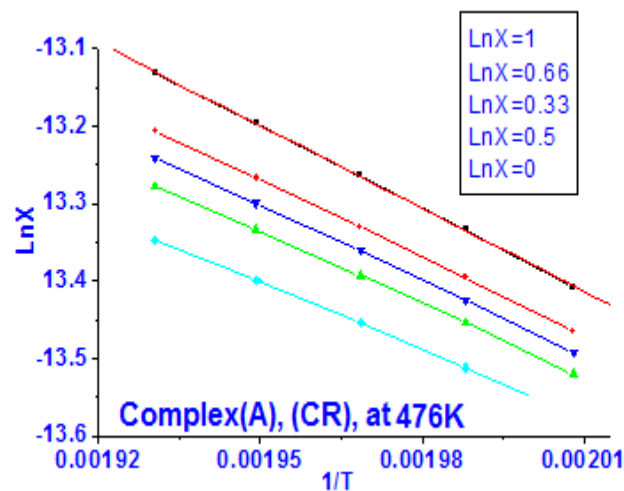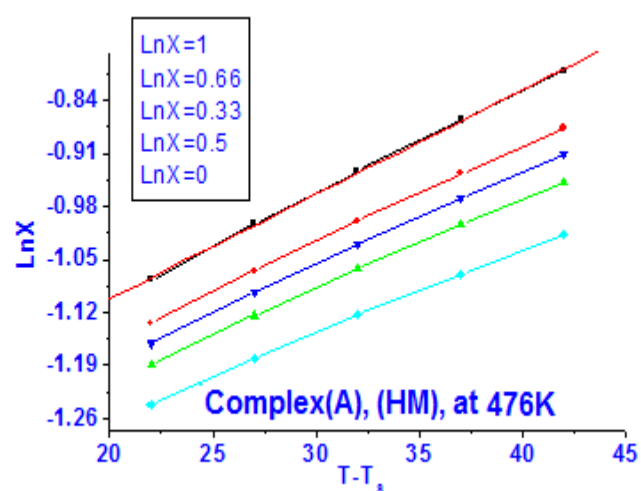

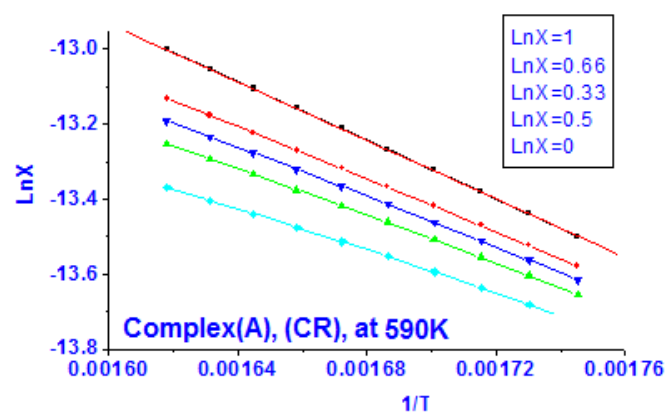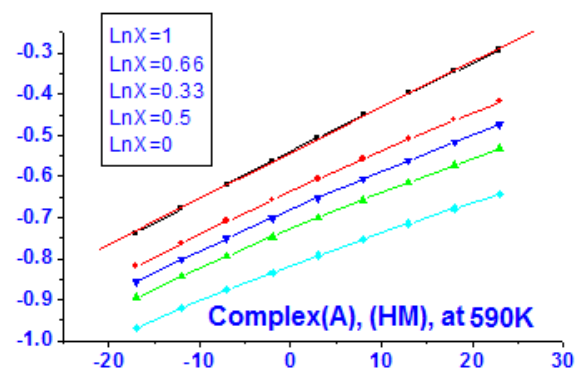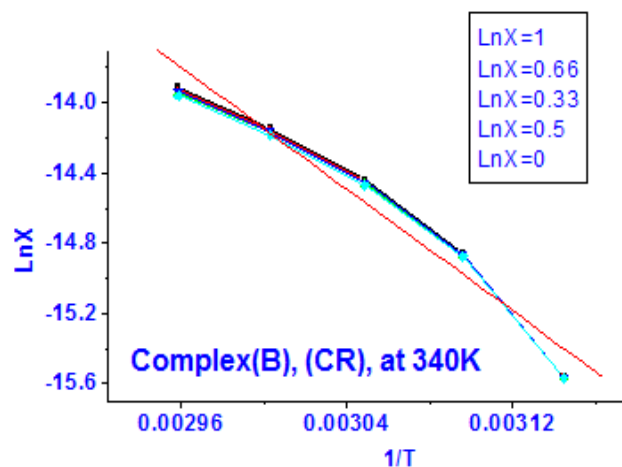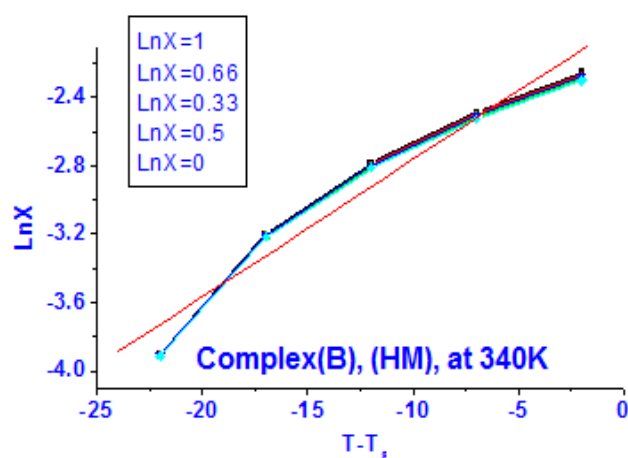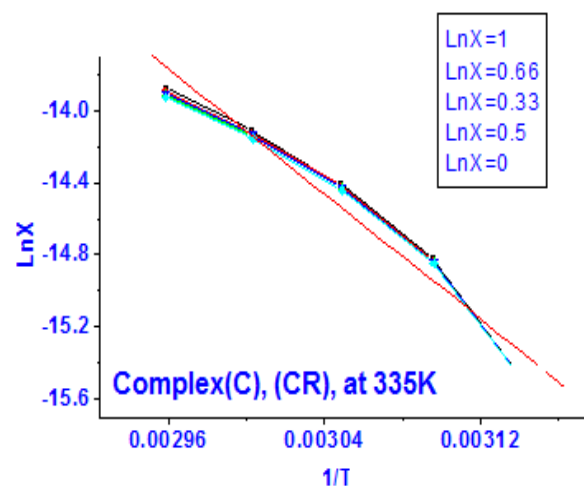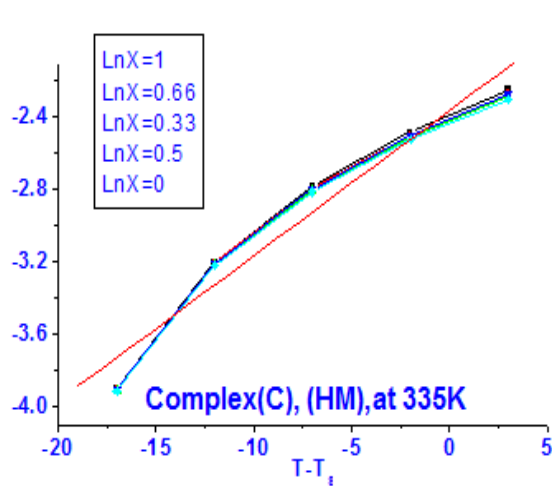



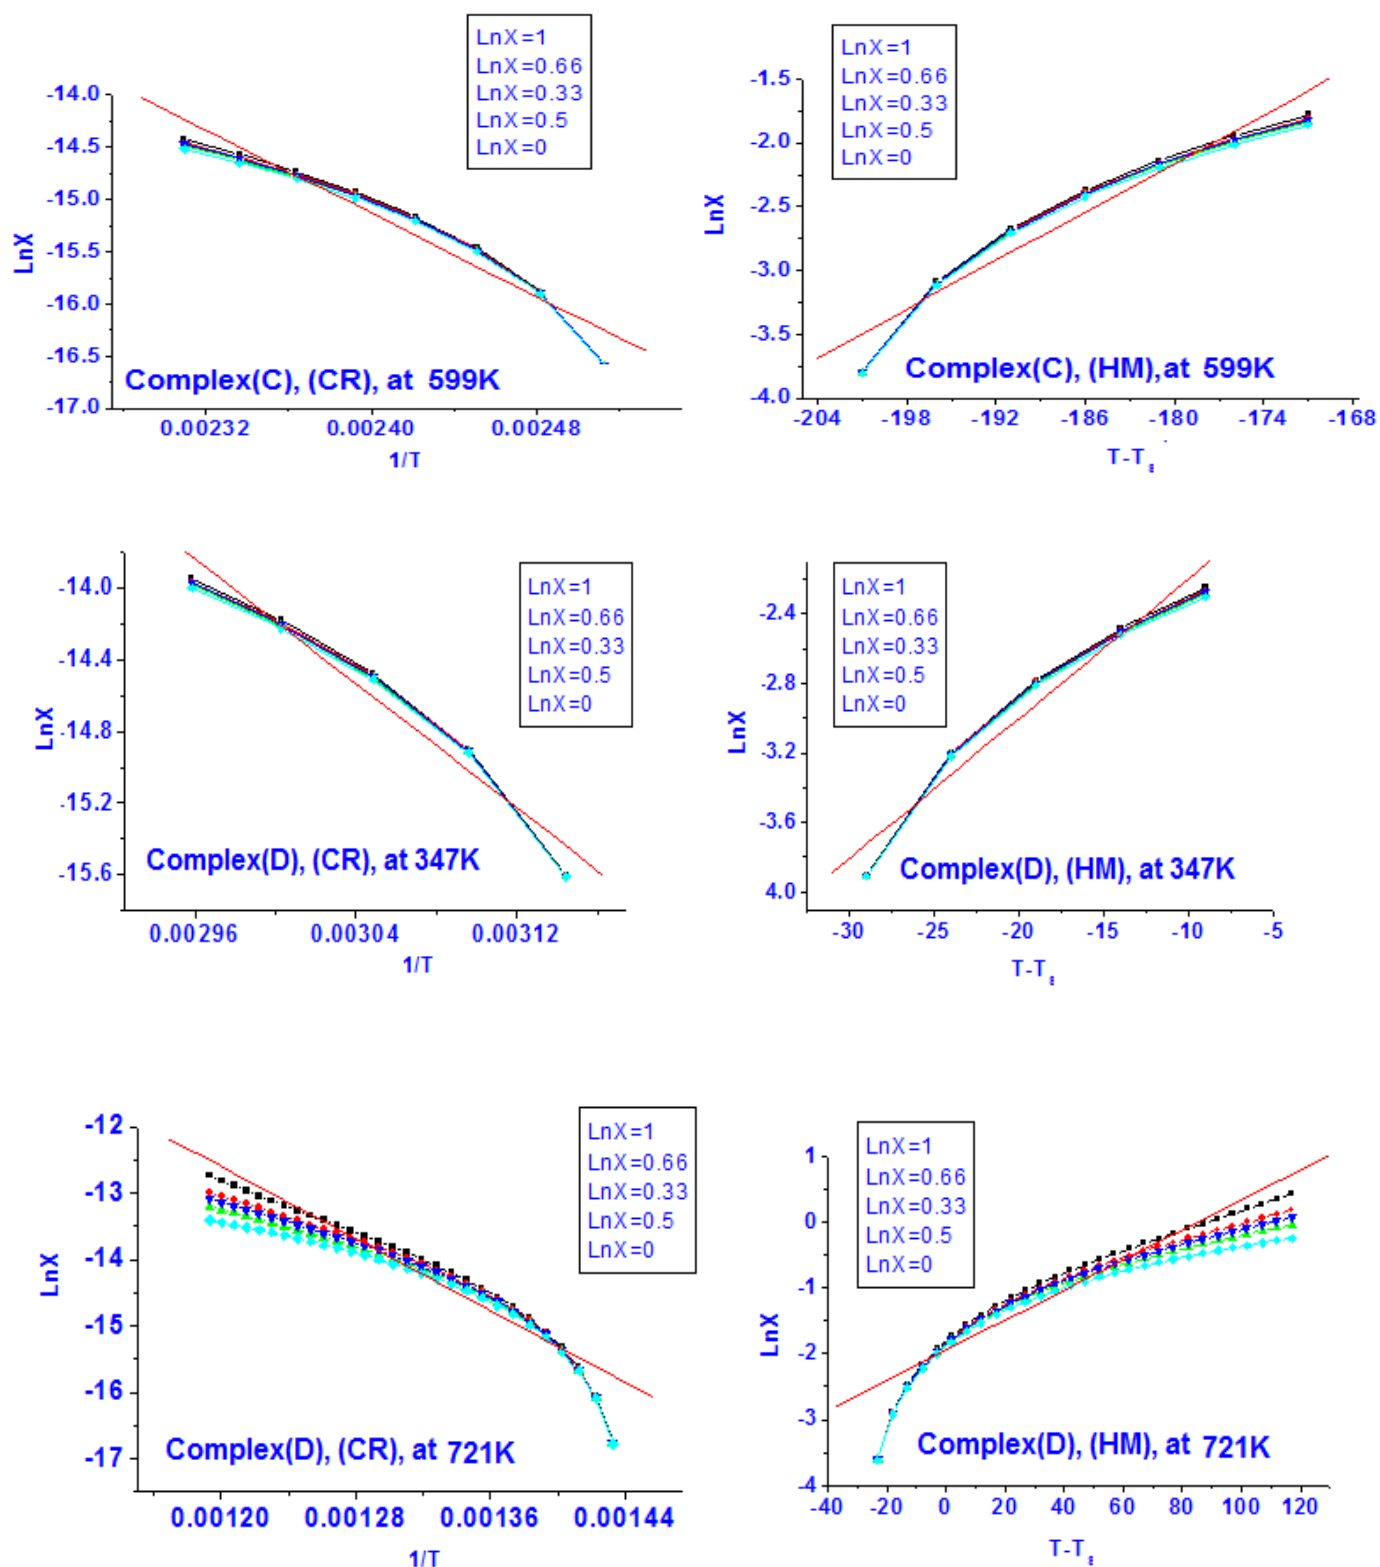

**Figure S5.** The diagrams of kinetic parameters of GMFX-o-phdn and its metal complexes using Coats-Redfern(CR) and Horowitz-Metzger (HM) equations
